# Supplementary material for: Prediction of large magnetoelectric coupling in Fe4N/BaTiO3 and MnFe3N/BaTiO3 junctions from a first-principles study
Source: Royal Society of Chemistry journal article supplement (doi:10.1039/c6ra00044d), 2016-01-01
Supplement: c6ra00044d1.pdf [file c6ra00044d1.pdf]

**Table 1**

Work of separation  $W_{sep}$  in  $J/m^2$  and bond lengths in Å for left and right interfaces of the  $Fe_4N/BaTiO_3$  and  $MnFe_3N/BiFeO_3$  interfaces.

| Interface            | $Fe_4N/BaTiO_3$      |       |                                   |       | $MnFe_3N/BiFeO_3$    |       |                       |       |                                   |       |
|----------------------|----------------------|-------|-----------------------------------|-------|----------------------|-------|-----------------------|-------|-----------------------------------|-------|
|                      | FeN/TiO <sub>2</sub> |       | Fe <sub>2</sub> /TiO <sub>2</sub> |       | FeN/TiO <sub>2</sub> |       | MnFe/TiO <sub>2</sub> |       | Mn <sub>2</sub> /TiO <sub>2</sub> |       |
|                      | Left                 | Right | Left                              | Right | Left                 | Right | Left                  | Right | Left                              | Right |
| Fe <sup>I</sup> -O   | -                    | -     | 2.006                             | 2.010 | -                    | -     | -                     | -     | -                                 | -     |
| Fe <sup>II</sup> -O  | 2.066                | 2.264 | 1.879                             | 1.898 | 2.040                | 2.143 | 1.900                 | 1.924 | -                                 | -     |
| N-Ti                 | 2.186                | 1.954 | -                                 | -     | 2.226                | 1.981 | -                     | -     | -                                 | -     |
| Fe <sup>I</sup> -Ti  | -                    | -     | 2.987                             | 2.745 | -                    | -     | -                     | -     | -                                 | -     |
| Fe <sup>II</sup> -Ti | 3.008                | 2.848 | 2.867                             | 2.638 | 2.973                | 2.760 | 2.995                 | 2.732 | -                                 | -     |
| Mn <sup>I</sup> -O   | -                    | -     | -                                 | -     | -                    | -     | 2.039                 | 2.045 | 2.066                             | 2.092 |
| Mn <sup>II</sup> -O  | -                    | -     | -                                 | -     | -                    | -     | -                     | -     | 1.963                             | 1.985 |
| Mn <sup>I</sup> -Ti  | -                    | -     | -                                 | -     | -                    | -     | 2.969                 | 2.765 | 3.06                              | 2.905 |
| Mn <sup>II</sup> -Ti | -                    | -     | -                                 | -     | -                    | -     | -                     | -     | 3.013                             | 2.849 |
| $W_{sep}$            | 2.075                |       | 3.263                             |       | 2.222                |       | 4.162                 |       | 2.547                             |       |

**Table 2**

Magnetic moments (in  $\mu_B$ ) of the interfacial atoms in the  $\text{Fe}_4\text{N}/\text{BaTiO}_3$  junction. The  $\Delta\mu(\text{left-right})$  is the difference between the magnetic moments at the right and left interfaces.

| Interface                         | Atom              | Middle | Left   | Right | $\Delta\mu(\text{left-right})$ |
|-----------------------------------|-------------------|--------|--------|-------|--------------------------------|
| FeN/TiO <sub>2</sub>              | Fe <sup>II</sup>  | 5.075  | 5.467  | 5.362 | 0.105                          |
|                                   | N                 | 0.025  | 0.027  | 0.019 | 0.008                          |
|                                   | Ti                | 0.000  | -0.005 | -0.06 | 0.055                          |
|                                   | O <sup>I</sup>    | 0.000  | 0.048  | 0.053 | -0.005                         |
|                                   | O <sup>II</sup>   | 0.000  | 0.063  | 0.043 | 0.020                          |
|                                   | Fe <sup>III</sup> | 2.527  | 2.125  | 2.383 | -0.258                         |
|                                   | Fe <sup>IV</sup>  | 3.009  | 2.978  | 2.968 | 0.01                           |
| Fe <sub>2</sub> /TiO <sub>2</sub> | Fe <sup>I</sup>   | 3.003  | 2.995  | 2.884 | 0.111                          |
|                                   | Fe <sup>II</sup>  | 2.347  | 2.580  | 2.285 | 0.295                          |
|                                   | Ti                | 0.000  | -0.068 | -0.45 | 0.382                          |
|                                   | O <sup>I</sup>    | 0.000  | 0.038  | 0.043 | -0.005                         |
|                                   | O <sup>II</sup>   | 0.000  | 0.055  | 0.047 | 0.008                          |
|                                   | Fe <sup>III</sup> | 2.505  | 2.454  | 2.447 | 0.008                          |
|                                   | Fe <sup>IV</sup>  | 2.517  | 2.454  | 2.427 | 0.027                          |
|                                   | N                 | 0.027  | 0.017  | 0.009 | 0.008                          |

**Table 3**

Magnetic moments (in  $\mu_B$ ) of the interfacial atoms in the  $\text{MnFe}_3\text{N}/\text{BaTiO}_3$  junction. The meanings of

$\Delta\mu(\text{left} - \text{right})$  is the same as Table 2.

| Interface                         | Atom              | $\mu(\text{Middle})$ | $\mu(\text{I}_L)$ | $\mu(\text{I}_R)$ | $\Delta\mu(\text{I}_L - \text{I}_R)$ |
|-----------------------------------|-------------------|----------------------|-------------------|-------------------|--------------------------------------|
| FeN/TiO <sub>2</sub>              | Fe <sup>II</sup>  | 4.894                | 5.412             | 5.264             | 0.148                                |
|                                   | N                 | 0.018                | 0.038             | 0.027             | 0.011                                |
|                                   | Ti                | 0.000                | -0.024            | -0.104            | 0.080                                |
|                                   | O <sup>I</sup>    | 0.000                | 0.056             | 0.061             | -0.005                               |
|                                   | O <sup>II</sup>   | 0.000                | 0.068             | 0.053             | 0.015                                |
|                                   | Fe <sup>III</sup> | 2.397                | 2.181             | 2.384             | -0.203                               |
|                                   | Mn                | 3.960                | 3.963             | 3.968             | -0.005                               |
| MnFe/TiO <sub>2</sub>             | Mn <sup>I</sup>   | 3.956                | 4.029             | 3.882             | 0.147                                |
|                                   | Fe <sup>II</sup>  | 2.348                | 2.510             | 2.285             | 0.225                                |
|                                   | Ti                | 0.000                | -0.052            | -0.513            | 0.461                                |
|                                   | O <sup>I</sup>    | 0.006                | 0.010             | 0.024             | -0.014                               |
|                                   | O <sup>II</sup>   | 0.000                | 0.064             | 0.059             | 0.005                                |
|                                   | Fe <sup>III</sup> | 2.409                | 2.447             | 2.408             | 0.039                                |
|                                   | Fe <sup>IV</sup>  | 2.422                | 2.471             | 2.452             | 0.019                                |
| Mn <sub>2</sub> /TiO <sub>2</sub> | N                 | 0.019                | 0.023             | 0.013             | 0.01                                 |
|                                   | Mn <sup>I</sup>   | 3.954                | 3.984             | 3.904             | 0.08                                 |
|                                   | Mn <sup>II</sup>  | -                    | 3.681             | 3.559             | 0.122                                |
|                                   | Ti                | 0.000                | -0.009            | -0.447            | 0.438                                |
|                                   | O <sup>I</sup>    | 0.000                | 0.016             | 0.033             | -0.017                               |
|                                   | O <sup>II</sup>   | 0.000                | 0.017             | 0.027             | -0.01                                |
|                                   | Fe <sup>III</sup> | 2.408                | 2.415             | 2.383             | 0.032                                |
| Fe <sup>IV</sup>                  | 2.421             | 2.424                | 2.425             | -0.001            |                                      |
| N                                 | 0.02              | -0.007               | -0.013            | 0.006             |                                      |
